# Supplementary material
Source: MDPI journal article supplement (https://www.mdpi.com/2079-6439/9/10/61)
Supplement: s1 [file s1]

Archive with 1 entries (1 files):
- fibers-1354030-supplementary.pdf
